# Supplementary material for: Synthesis of bis(bora)calix[4]arenes bearing perfluoroaryl substituents
Source: Royal Society of Chemistry journal article supplement (doi:10.1039/b509556e), 2005-01-01
Supplement: b509556e.pdf [file b509556e.pdf]

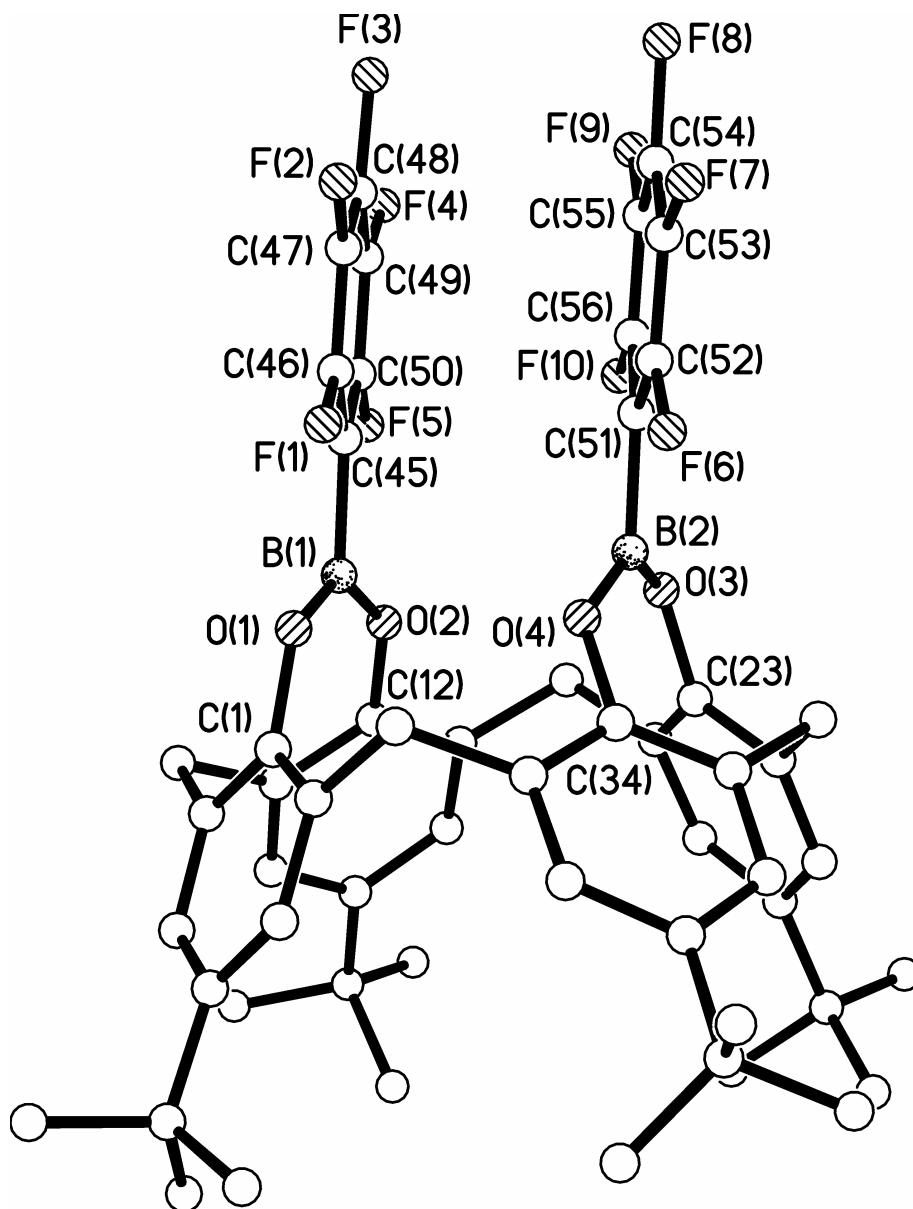

**ESI Fig 1** Alternative view of **1** showing  $\text{Ar}^f$  rings  $\pi$ -stacked and the twist of the  $\text{Ar}^f$  rings relative to the  $\text{BO}_2$  fragments.

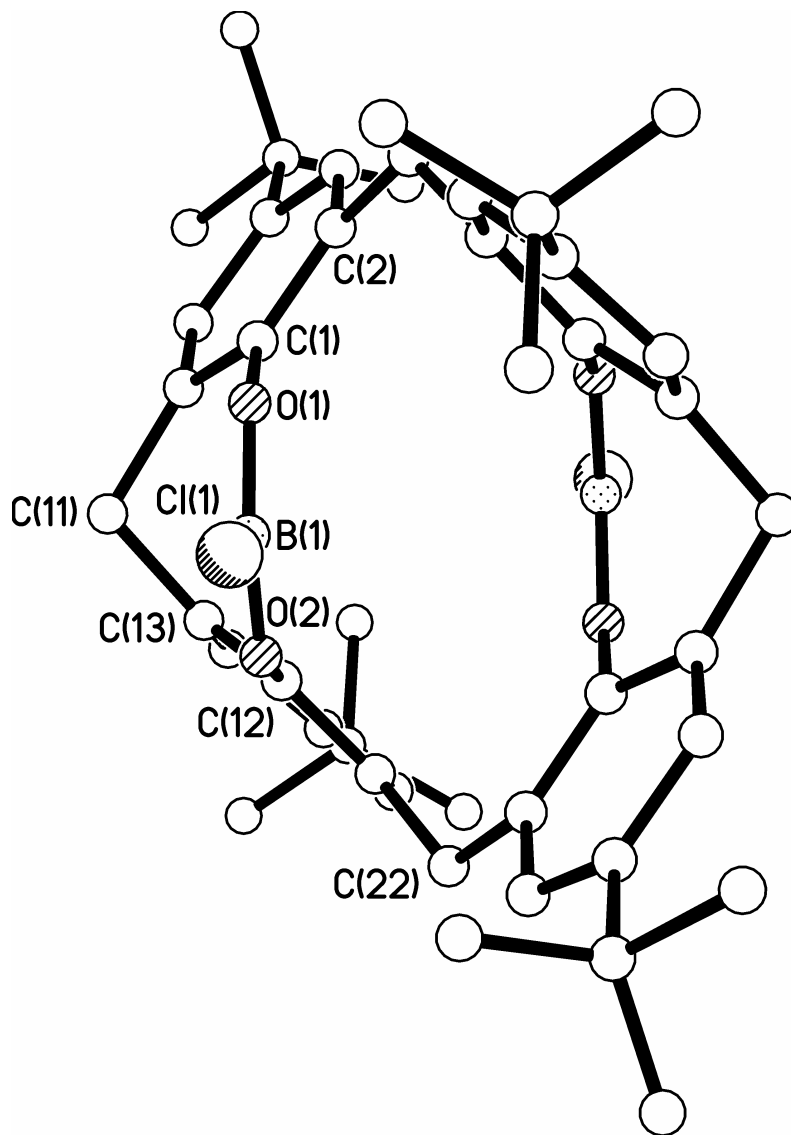

**ESI Fig 2** Alternative view of **2** along the B–Cl bond direction highlighting the Cl in the cleft between 2 calixarene rings.

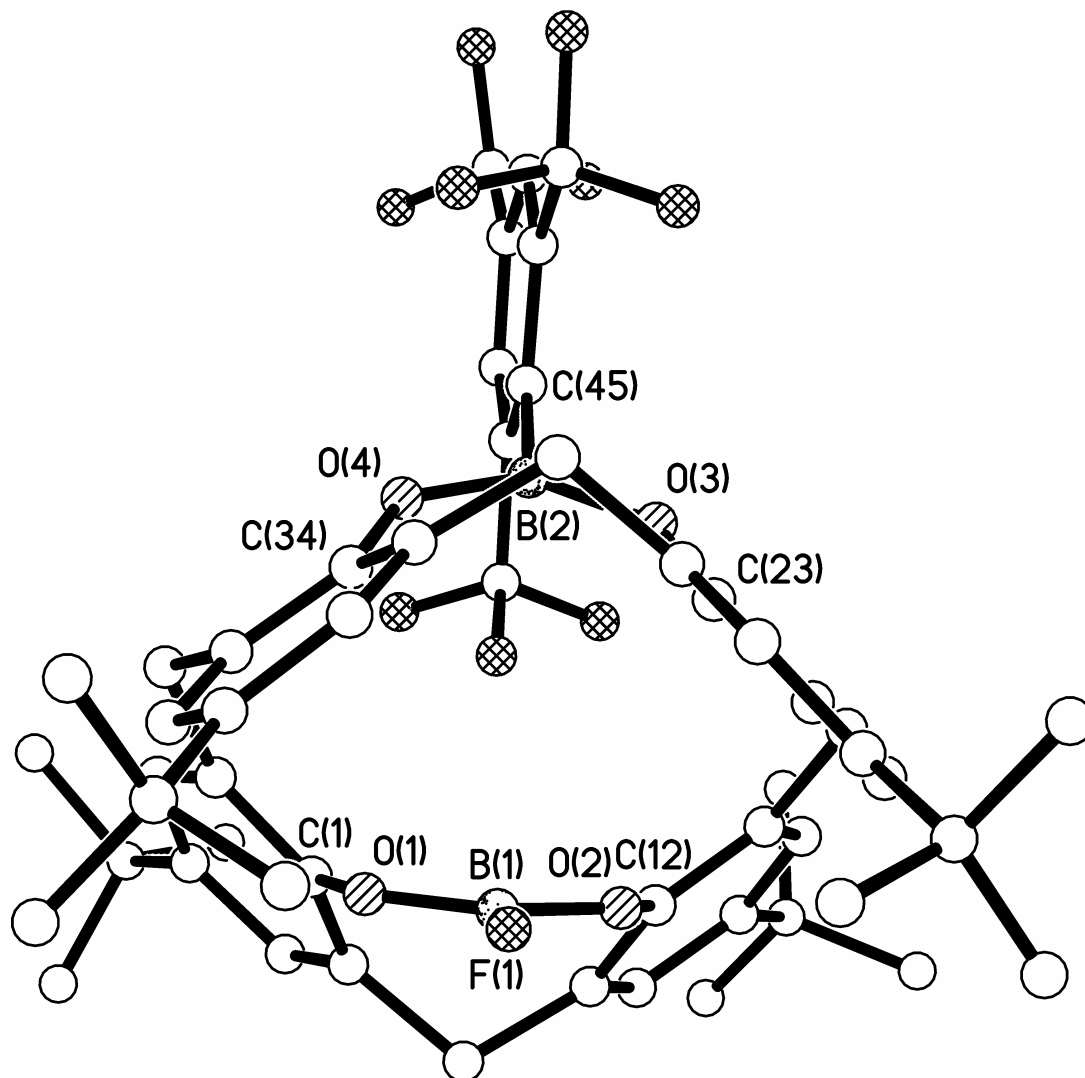

**ESI Fig 3** Alternative view of **3** along the B–F bond direction showing F and CF<sub>3</sub> groups in calixarene clefts.

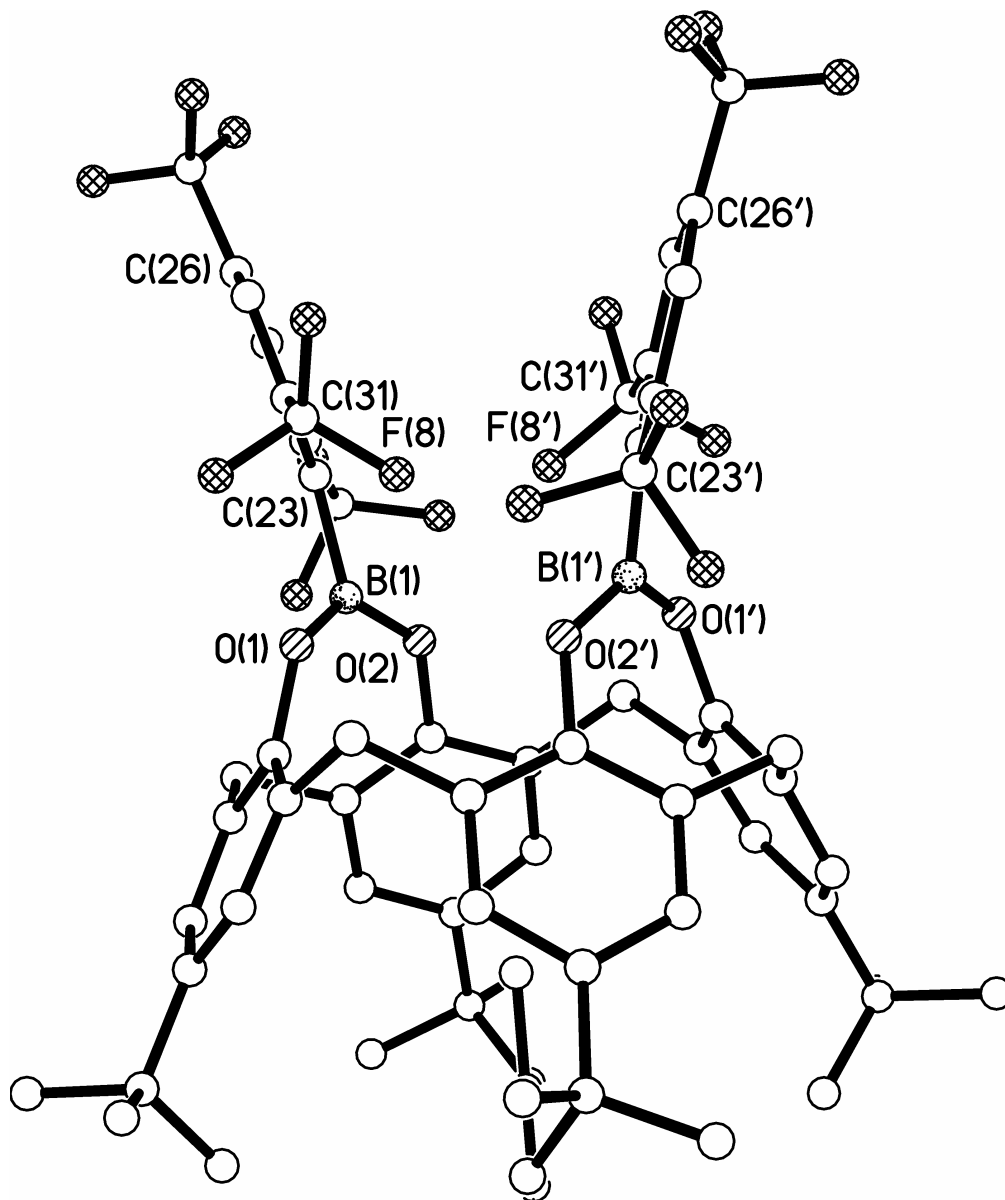

**ESI Fig 4** Alternative view of **4** showing the Ar<sup>f</sup> groups distorted to avoid unfavourable CF<sub>3</sub>...CF<sub>3</sub> steric interactions and the twist of the Ar<sup>f</sup> rings relative to the BO<sub>2</sub> fragments.
